# Supplementary material for: A Versatile Aldehyde: Ferredoxin Oxidoreductase from the Organic Acid Reducing Thermoanaerobacter sp. Strain X514
Source: Int J Mol Sci. 2024 Jan 16;25(2):1077. doi: 10.3390/ijms25021077 (PMC10816221; doi:10.3390/ijms25021077)
Supplement: Supplementary file 1 [file ijms-25-01077-s001.zip › Rawdata ijms-2752207_2.xlsx]

## Sheet: fig4A
assay temperature [°C]	Specific activity [U/mg]	single values	assay temperature [°C]	mean values	standard derivation		assay temperature [°C]	specific activity [U/mg]	single values	assay temperature [°C]	mean values	standard derivation
10	0.222973	0.0118238	10	0.00857227	0.00193835		65	9.79297	0.953125	65	1	0.0506643
10	0.133784	0.0070943					65	9.87324	0.960938
10	0.133784	0.0070943					65	10.3281	1.00521
10	0.156081	0.00827668					65	11.1041	1.08073
20	0.423649	0.0224653	20	0.0254212	0.00243754		70	12.4419	1.21094	70	1.3151	0.0848455
20	0.535135	0.0283772					70	13.86	1.34896
20	0.445946	0.0236477					70	13.0038	1.26563
20	0.512838	0.0271948					70	14.743	1.4349
30	1.73919	0.0922258	30	0.091339	0.00670813		75	13.6995	1.33333	75	1.44401	0.0866546
30	1.71689	0.0910435					75	14.2614	1.38802
30	1.53851	0.0815844					75	15.4922	1.50781
30	1.89527	0.100503					75	15.8935	1.54688
40	3.61216	0.191546	40	0.203074	0.0128269		80	16.2414	1.58073	80	1.65234	0.0993943
40	3.85743	0.204552					80	17.3116	1.6849
40	3.63446	0.192728					80	15.8668	1.54427
40	4.21419	0.22347					80	18.4889	1.79948
50	7.89324	0.418563	50	0.434821	0.0229938		85	15.4386	1.5026	85	1.50781	0.0328889
50	8.36149	0.443393					85	16.0541	1.5625
50	7.71486	0.409104					85	15.3049	1.48958
50	8.82973	0.468223					85	15.1711	1.47656
55	10.9034	0.578185	55	0.542122	0.0539022		90	13.7797	1.34115	90	1.19076	0.102383
55	11.4385	0.606562					90	12.2011	1.1875
55	9.72162	0.515519					90	12.1476	1.18229
55	8.82973	0.468223					90	10.8097	1.05208
60	12.9324	0.685782	60	0.749039	0.0380435		95	12.4954	1.21615	95	0.904845	0.182301
60	14.3818	0.762637					95	7.81297	0.760417
60	14.85	0.787467					95	8.69595	0.846354
60	14.3372	0.760272					95	8.18335	0.796465
65	18.5514	0.983742	65	1	0.0306095
65	19.0865	1.01212
65	19.6662	1.04286
65	18.1277	0.961277
70	21.227	1.12563	70	1.09104	0.0431154
70	19.2872	1.02276
70	20.4689	1.08543
70	21.3162	1.13036
75	27.5595	1.46142	75	1.34732	0.0721665
75	24.0142	1.27343
75	25.5527	1.35501
75	24.5047	1.29944
80	19.0865	1.01212	80	1.12947	0.0829034
80	20.5804	1.09134
80	22.5872	1.19775
80	22.9439	1.21667
85	23.3676	1.23914	85	1.19509	0.0384445
85	22.9439	1.21667
85	22.4088	1.18829
85	21.4277	1.13627
90	16.3216	0.865504	90	0.94295	0.0899563
90	20.625	1.0937
90	17.5034	0.92817
90	16.6784	0.884422

## Sheet: fig4B
65 °C						75 °C						85 °C
time at 65°C [min]	specific activity [U/mg]	single values	mean values	SD		time at 75°C	specific activity [U/mg]	single values	mean values	SD		time at 85°C	specific activity [U/mg]	single values	mean values	SD
0	31.4396	1	1	0		0	27.6932	1	1	0		0	28.2028	1	1	0
1	29.8212	0.948522	0.896053	0.0371199		1	19.661	0.709957	0.744555	0.0230759		1	16.2743	0.577046	0.570093	0.0649711
3	22.2085	0.706387	0.689902	0.0176589		3	12.4979	0.451299	0.470852	0.0249129		3	0	0	0.135249	0.0857902
5	18.0725	0.574833	0.607801	0.0510876		5	8.30198	0.299784	0.30622	0.0441263		5	0	0	0.0178538	0.0181055
10	11.419	0.363203	0.373755	0.0468623		7	0	0	0.152584	0.0726516
15	9.1112	0.2898	0.286461	0.0223927		10	0.0599421	0.0021645	0.0509975	0.051678		0	24.9059	1
20	5.87432	0.186845	0.183271	0.0285809		15	0	0	0.014479	0.0150534		1	11.6887	0.469314
30	2.69739	0.085796	0.0800027	0.0188979								3	5.93427	0.238267
45	0.809218	0.0257388	0.0189857	0.00594197		0	24.3665	1				5	0	0
						1	18.8818	0.774908
0	30.061	1				3	12.1982	0.500615				0	27.6333	1
1	26.1048	0.868395				5	6.47375	0.265683				1	17.9826	0.650759
3	20.9797	0.697906				7	1.3487	0.0553506				3	4.10603	0.14859
5	20.4403	0.67996				10	0	0				5	0.86916	0.0314534
10	13.0973	0.435693				15	0	0
15	9.38094	0.312064										0	31.4996	1
20	6.50372	0.216351				0	31.02	1				1	18.3722	0.583254
30	2.9971	0.0997009				1	23.1976	0.747826				3	4.85531	0.154139
45	0.599421	0.0199402				3	15.1953	0.489855				5	1.25878	0.0399619
						5	11.7786	0.37971
0	31.8892	1				7	7.13311	0.229952
1	27.7832	0.871241				10	3.71641	0.119807
3	21.2195	0.665414				15	1.07896	0.0347826
5	18.1325	0.568609
10	10.2801	0.322368				0	28.5025	1
15	8.21207	0.257519				1	21.2495	0.745531
20	4.67548	0.146617				3	12.5878	0.44164
30	1.73832	0.0545113				5	7.9723	0.279706
45	0.359653	0.0112782				7	4.91525	0.17245
						10	2.33774	0.0820189
						15	0.659363	0.0231335

## Sheet: fig5A
	Relative specific activity								Relative specific activity
buffer	pH value	specific activity [U/mg]	single values		mean values	SD		Buffer	pH value	Spezifische Aktivität [U/mg]	single values		mean values	SD
MES	5.5	0.471197	0.0647773	5.5	0.0657895	0.0108541		MES	5.5	3.50661	0.0912281	5.5	0.0923977	0.00475889
MES	5.5	0.353398	0.048583					MES	5.5	3.32679	0.0865497
MES	5.5	0.559546	0.0769231					MES	5.5	3.53658	0.0920078
MES	5.5	0.530097	0.0728745					MES	5.5	3.83629	0.0998051
MES	6	1.79644	0.246964	6	0.251012	0.0437921		MES	6	10.6097	0.276023	6	0.287135	0.0138539
MES	6	1.44304	0.198381					MES	6	11.0593	0.287719
MES	6	1.73754	0.238866					MES	6	10.5798	0.275244
MES	6	2.32653	0.319838					MES	6	11.8985	0.309552
MES	6.5	5.38931	0.740891	6.5	0.601721	0.0911592		MES	6.5	27.4235	0.71345	6.5	0.647758	0.0472954
MES	6.5	4.35857	0.59919					MES	6.5	26.0448	0.677583
MES	6.5	5.06537	0.696356					MES	6.5	26.3445	0.68538
MES	6.5	4.88867	0.672065					MES	6.5	26.5244	0.690058
MOPS	6.5	3.32783	0.45749					MOPS	6.5	22.4483	0.584016
MOPS	6.5	3.71068	0.510121					MOPS	6.5	24.5763	0.639376
MOPS	6.5	4.35857	0.59919					MOPS	6.5	23.0178	0.59883
MOPS	6.5	3.91682	0.538462					MOPS	6.5	22.808	0.593372
MOPS	7	7.0385	0.967611	7	1.01316	0.0479355		MOPS	7	38.9024	1.01209	7	0.990448	0.0135768
MOPS	7	7.06795	0.97166					MOPS	7	38.1232	0.991813
MOPS	7	7.48025	1.02834					MOPS	7	37.6736	0.980117
MOPS	7	7.89255	1.08502					MOPS	7	37.5837	0.977778
MOPS	7.5	11.0437	1.51822	7.5	1.23482	0.243589		MOPS	7.5	47.8937	1.246	7.5	1.12768	0.131849
MOPS	7.5	10.0129	1.37652					MOPS	7.5	48.2234	1.25458
MOPS	7.5	10.9259	1.50202					MOPS	7.5	47.2344	1.22885
MOPS	7.5	10.7786	1.48178					MOPS	7.5	49.662	1.29201
TRIS	7.5	7.53915	1.03644					TRIS	7.5	38.8724	1.01131
TRIS	7.5	6.36116	0.874494					TRIS	7.5	38.8425	1.01053
TRIS	7.5	7.5097	1.03239					TRIS	7.5	35.9053	0.934113
TRIS	7.5	7.6864	1.05668					TRIS	7.5	40.1312	1.04405
TRIS	8	10.9553	1.50607	8	1.47672	0.023147		TRIS	8	54.2776	1.41209	8	1.42515	0.0110184
TRIS	8	10.8375	1.48988					TRIS	8	54.6372	1.42144
TRIS	8	10.6608	1.46559					TRIS	8	55.4464	1.4425
TRIS	8	10.5136	1.44534					TRIS	8	54.7571	1.42456
TRIS	8.5	14.99	2.06073	8.5	2.38765	0.336043		TRIS	8.5	62.4597	1.62495	8.5	1.63723	0.0559936
TRIS	8.5	14.666	2.01619					TRIS	8.5	66.1461	1.72086
TRIS	8.5	15.9618	2.19433					TRIS	8.5	61.9801	1.61248
TRIS	8.5	14.5188	1.99595					TRIS	8.5	64.168	1.6694
TRIS	9	19.9964	2.74899	9	2.85223	0.0994378		TRIS	9	69.0833	1.79727	9	1.7614	0.0559016
TRIS	9	21.0566	2.89474					TRIS	9	65.8164	1.71228
TRIS	9	21.4395	2.94737					TRIS	9	69.9524	1.81988
TRIS	9	20.7032	2.84615					TRIS	9	68.7835	1.78947
CHES	8.5	20.9094	2.87449					CHES	8.5	63.119	1.64211
CHES	8.5	18.9951	2.61134					CHES	8.5	58.3836	1.51891
CHES	8.5	20.1142	2.76518					CHES	8.5	62.4896	1.62573
CHES	8.5	18.789	2.583					CHES	8.5	64.7075	1.68343
CHES	9	19.2013	2.63968					CHES	9	69.7426	1.81442
CHES	9	21.3806	2.93927					CHES	9	68.5138	1.78246
CHES	9	21.145	2.90688					CHES	9	63.3888	1.64912
CHES	9	21.0566	2.89474					CHES	9	66.3559	1.72632
CHES	9.5	23.9132	3.28745	9.5	3.07692	0.1972
CHES	9.5	22.1757	3.04858
CHES	9.5	23.2948	3.20243
CHES	9.5	20.1437	2.76923
CHES	10	28.3013	3.89069	10	4.08401	0.333479
CHES	10	28.5958	3.93117
CHES	10	31.7469	4.36437
CHES	10	27.2411	3.74494
CAPS	10	33.9262	4.66397
CAPS	10	26.122	3.59109
CAPS	10	30.4806	4.19028
CAPS	10	31.2462	4.29555
CAPS	10.5	36.8417	5.06478	10.5	4.89575	0.186287
CAPS	10.5	36.3705	5
CAPS	10.5	33.3372	4.583
CAPS	10.5	35.8993	4.93522
CAPS	11	34.898	4.79757	11	5.12955	0.417387
CAPS	11	42.1132	5.78947
CAPS	11	37.7252	5.18623
CAPS	11	34.5152	4.74494
CAPS	11.5	34.7213	4.77328	11.5	4.98381	0.43518
CAPS	11.5	32.7776	4.50607
CAPS	11.5	36.1938	4.97571
CAPS	11.5	41.3181	5.68016

## Sheet: fig5B
AOR-His
Exposure to air [min]	Spezifische Aktivität [U/mg]	single values		mean values	SD
0	17.8888	1	0	1	0
1	13.3313	0.74523	1	0.677654	0.239676
3	2.81081	0.157127	3	0.310295	0.238135
5	2.0278	0.113356	5	0.273156	0.198192
10	1.82703	0.102132	10	0.132998	0.0331697
15	1.82703	0.102132	15	0.140557	0.0628291
20	2.67027	0.14927	20	0.121604	0.032917
30	2.10811	0.117845	30	0.108641	0.0460848
0	22.0849	1
1	20.2378	0.916364
3	16.1019	0.729091
5	13.9938	0.633636
10
15	5.54131	0.250909
20	3.4332	0.155455
30	2.36911	0.107273
0	22.0849	1
1	18.3305	0.83
3	9.35598	0.423636
5	7.46873	0.338182
10	4.0556	0.183636
15	1.44556	0.0654545
20	1.44556	0.0654545
30	0.883398	0.04
0	14.9776	1
1	10.0185	0.668901
3	1.74672	0.116622
5	1.70656	0.113941
10	1.56602	0.104558
15	1.90734	0.127346
20	1.5861	0.105898
30
0	14.4556	1
1	3.29266	0.227778
3	1.80695	0.125
5	2.40927	0.166667
10	2.04788	0.141667
15	2.26873	0.156944
20	1.90734	0.131944
30	2.44942	0.169444

## Sheet: fig6
Exp 1
	Specific activity [U/mg]	Relative specific activity			mean value	SD
2 mM formaldeyde	2.03979	0.392982		2 mM formaldeyde	0.514537	0.0884716
0.1 mM acetaldehyde	5.19054	1		0.1 mM acetaldehyde	1	0
0.1 mM propionaldehyde	3.63649	0.700599		0.1 mM propionaldehyde	0.874033	0.124663
0.1 mM butyraldehyde	3.91622	0.754491		0.1 mM butyraldehyde	0.708809	0.143448
0.01 mM valeraldehyde	3.35676	0.646707		0.01 mM valeraldehyde	0.619453	0.0944327
0.01 mM caproaldehyde	2.73514	0.526946		0.01 mM caproaldehyde	0.583984	0.0658081
0.01 mM heptanal	2.98378	0.57485		0.01 mM heptanal	0.488109	0.12026
0.01 mM octanal	1.67838	0.323353		0.01 mM octanal	0.402717	0.0643445
0.01 mM nonanal	2.57973	0.497006		0.01 mM nonanal	0.28272	0.165112
0.01 mM decanal	2.82838	0.54491		0.01 mM decanal	0.202779	0.242144
0.1 mM isobutyraldehyde	3.88514	0.748503		0.1 mM isobutyraldehyde	0.806343	0.0797032
0.97 mM 2-methylbutyraldehyde	1.08784	0.209581		0.97 mM 2-methylbutyraldehyde	0.243177	0.0255304
0.1 mM isovaleraldehyde	1.15	0.221557		0.1 mM isovaleraldehyde	0.257078	0.0301381
0.1 mM 2-methylvaleraldehyde	1.27432	0.245509		0.1 mM 2-methylvaleraldehyde	0.301565	0.0744687
0.01 mM 2-ethylbutylaldehyde	0.621622	0.11976		0.01 mM 2-ethylbutylaldehyde	0.101792	0.0249088
0.1 mM 2-ethylcaproaldehyde	0.714865	0.137725		0.1 mM 2-ethylcaproaldehyde	0.146228	0.0110987
0.1 mM benzaldehyde	2.85946	0.550898		0.1 mM benzaldehyde	0.85631	0.218247
0.97 mM phenylacetaldehyde	3.91622	0.754491		0.97 mM phenylacetaldehyde	0.848435	0.0789312
0.1 mM hydrocinnamaldehyde	3.41892	0.658683		0.1 mM hydrocinnamaldehyde	0.873703	0.180343
0.97 mM 3-phenylbutyraldehyde	0.994595	0.191617		0.97 mM 3-phenylbutyraldehyde	0.198201	0.00536651
0.97 mM 2-phenylpropionaldehyde	1.95811	0.377246		0.97 mM 2-phenylpropionaldehyde	0.377547	0.0128968
0.1 mM cyclopentanecarbaldehyde	1.02568	0.197605		0.1 mM cyclopentanecarbaldehyde	0.230478	0.0246996
0.1 mM crotonaldehyde	3.91622	0.754491		0.1 mM crotonaldehyde	0.821268	0.073605
0.1 mM trans-cinnamaldehyde	4.94189	0.952096		0.1 mM trans-cinnamaldehyde	0.907433	0.110105
0.97 mM furfural	4.13378	0.796407		0.97 mM furfural	0.925373	0.112925
0.97 mM glutaraldehyde	2.61081	0.502994		0.97 mM glutaraldehyde	0.708864	0.147147
0.1 mM naphthaldehyde	4.00946	0.772455		0.1 mM naphthaldehyde	0.869249	0.104454
Exp 2
2 mM formaldeyde	6.61951	0.600989
0.1 mM acetaldehyde	11.0144	1
0.1 mM propionaldehyde	10.2801	0.933333
0.1 mM butyraldehyde	9.44088	0.857143
0.01 mM valeraldehyde	7.91985	0.719048
0.01 mM caproaldehyde	7.4478	0.67619
0.01 mM heptanal	6.29392	0.571429
0.01 mM octanal	5.29738	0.480952
0.01 mM nonanal	1.04899	0.0952381
0.01 mM decanal	0.209797	0.0190476
0.1 mM isobutyraldehyde	10.1227	0.919048
0.97 mM 2-methylbutyraldehyde	2.98961	0.271429
0.1 mM isovaleraldehyde	3.25186	0.295238
0.1 mM 2-methylvaleraldehyde	2.77981	0.252381
0.01 mM 2-ethylbutylaldehyde	1.31123	0.119048
0.1 mM 2-ethylcaproaldehyde	1.78328	0.161905
0.1 mM benzaldehyde	11.5389	1.04762
0.97 mM phenylacetaldehyde	10.4374	0.947619
0.1 mM hydrocinnamaldehyde	12.1158	1.1
0.97 mM 3-phenylbutyraldehyde	2.25532	0.204762
0.97 mM 2-phenylpropionaldehyde	3.98615	0.361905
0.1 mM cyclopentanecarbaldehyde	2.83226	0.257143
0.1 mM crotonaldehyde	10.1752	0.92381
0.1 mM trans-cinnamaldehyde	11.1717	1.01429
0.97 mM furfural	11.8011	1.07143
0.97 mM glutaraldehyde	9.23108	0.838095
0.1 mM naphthaldehyde	11.1717	1.01429
Exp 3
2 mM formaldeyde	19.4878	0.549638
0.1 mM acetaldehyde	35.4557	1
0.1 mM propionaldehyde	35.0361	0.988166
0.1 mM butyraldehyde	18.2524	0.514793
0.01 mM valeraldehyde	17.4656	0.492604
0.01 mM caproaldehyde	19.4587	0.548817
0.01 mM heptanal	11.2766	0.318047
0.01 mM octanal	14.3187	0.403846
0.01 mM nonanal	9.07373	0.255917
0.01 mM decanal	1.57348	0.0443787
0.1 mM isobutyraldehyde	26.6443	0.751479
0.97 mM 2-methylbutyraldehyde	8.81149	0.248521
0.1 mM isovaleraldehyde	9.02128	0.254438
0.1 mM 2-methylvaleraldehyde	14.4236	0.406805
0.01 mM 2-ethylbutylaldehyde	2.36022	0.066568
0.1 mM 2-ethylcaproaldehyde	4.93024	0.139053
0.1 mM benzaldehyde	34.4068	0.970414
0.97 mM phenylacetaldehyde	29.8961	0.843195
0.1 mM hydrocinnamaldehyde	30.578	0.862426
0.97 mM 3-phenylbutyraldehyde	7.02821	0.198225
0.97 mM 2-phenylpropionaldehyde	13.9515	0.393491
0.1 mM cyclopentanecarbaldehyde	8.39189	0.236686
0.1 mM crotonaldehyde	27.8506	0.785503
0.1 mM trans-cinnamaldehyde	26.8016	0.755917
0.97 mM furfural	32.2039	0.908284
0.97 mM glutaraldehyde	27.8506	0.785503
0.1 mM naphthaldehyde	29.1094	0.821006

## Sheet: fig7A
time [s]	430,0 nm
0	0.002639
2	0.001053
4	-0.002589
6	0.45936
8	0.372504
10	0.282841
12	0.274582
14	0.273094
16	0.272231
18	0.266504
20	0.439871
22	-0.040702
24	-0.041176
26	0.270961
28	0.272235
30	0.273013
32	0.273892
34	0.272756
36	0.274984
38	0.272684
40	0.270343
42	0.269322
44	0.269897
46	0.49387
48	0.288692
50	0.142677
52	-0.041023
54	0.273007
56	0.273529
58	0.273811
60	0.271986
60.5	0.27271
61	0.273885
61.5	0.274362
62	0.26951
62.5	0.26895
63	0.266654
63.5	0.26363
64	0.2614
64.5	0.260726
65	0.256971
65.5	0.265065
66	0.262706
66.5	0.290701
67	0.265789
67.5	0.252034
68	0.235746
68.5	-0.0415
69	-0.040379
69.5	-0.033081
70	0.186214
70.5	0.174494
71	0.171199
71.5	0.165414
72	0.162055
72.5	0.159018
73	0.155025
73.5	0.154919
74	0.153252
74.5	0.152887
75	0.154661
75.5	0.153784
76	0.151857
76.5	0.148323
77	0.146535
77.5	0.145682
78	0.14383
78.5	0.143375
79	0.143023
79.5	0.142857
80	0.142006
80.5	0.143473
81	0.143733
81.5	0.145023
82	0.142872
82.5	0.141296
83	0.141803
83.5	0.139807
84	0.139235
84.5	0.138377
85	0.137798
85.5	0.137251
86	0.137019
86.5	0.136784
87	0.137656
87.5	0.137284
88	0.135478
88.5	0.135484
89	0.134937
89.5	0.135897
90	0.135906
90.5	0.13544
91	0.134653
91.5	0.134586
92	0.135397
92.5	0.135048
93	0.133699
93.5	0.133589
94	0.13346
94.5	0.134988
95	0.133311
95.5	0.132476
96	0.132328
96.5	0.133346
97	0.13498
97.5	0.135373
98	0.132929
98.5	0.13048
99	0.1304
99.5	0.130019
100	0.130784
100.5	0.130699
101	0.130794
101.5	0.131226
102	0.131169
102.5	0.131688
103	0.132504
103.5	0.132399
104	0.133852
104.5	0.132247
105	0.130956
105.5	0.130319
106	0.128153
106.5	0.128163
107	0.129464
107.5	0.129759

## Sheet: fig7B
time [s]	430,0 nm
0	-0.000367
2	-0.000653
4	0.00031
6	0.00139
8	0.467565
10	0.420416
12	-0.040057
14	-0.039733
16	0.358817
18	0.356638
20	0.359263
22	0.357551
24	0.35822
26	0.358235
28	0.358721
30	0.546302
32	0.356995
34	-0.039083
36	-0.039977
38	0.349287
40	0.346937
42	0.345188
44	0.341327
46	0.336506
48	0.335191
50	0.333001
52	0.328883
54	0.326114
56	0.321607
58	0.316883
60	0.314057
60.5	0.31397
61	0.313854
61.5	0.31179
62	0.316926
62.5	0.378364
63	0.482821
63.5	0.355664
64	0.325258
64.5	0.319396
65	0.218102
65.5	-0.038026
66	-0.037383
66.5	-0.038607
67	-0.038665
67.5	0.286046
68	0.279282
68.5	0.275555
69	0.269745
69.5	0.265828
70	0.262584
70.5	0.259833
71	0.256532
71.5	0.254233
72	0.251523
72.5	0.248755
73	0.245937
73.5	0.244942
74	0.242149
74.5	0.241789
75	0.240981
75.5	0.238689
76	0.237482
76.5	0.2353
77	0.234418
77.5	0.232835
78	0.231135
78.5	0.231572
79	0.231568
79.5	0.230641
80	0.228621
80.5	0.22724
81	0.227242
81.5	0.226507
82	0.226777
82.5	0.225855
83	0.225637
83.5	0.225058
84	0.224495
84.5	0.22269
85	0.22297
85.5	0.224414
86	0.222161
86.5	0.221458
87	0.220344
87.5	0.219139
88	0.219325
88.5	0.218418
89	0.217945
89.5	0.216513
90	0.216519
90.5	0.217133
91	0.216042
91.5	0.216967
92	0.215739
92.5	0.215893
93	0.216651
93.5	0.218079
94	0.216219
94.5	0.215457
95	0.213912
95.5	0.214552
96	0.214135
96.5	0.212482
97	0.21151
97.5	0.212242
98	0.212078
98.5	0.211362
99	0.21118
99.5	0.211204
100	0.211113
100.5	0.211033
101	0.212367
101.5	0.210919
102	0.210517
102.5	0.210059
103	0.211227
103.5	0.211801
104	0.210885
104.5	0.210517
105	0.211335
105.5	0.211409
106	0.210081
106.5	0.210415
107	0.21062
107.5	0.210692
108	0.209997
108.5	0.209687
109	0.209878
109.5	0.2092
110	0.208918
110.5	0.209216
111	0.208878
111.5	0.208726
112	0.208392
112.5	0.208471
113	0.208709
113.5	0.207852
114	0.207649
114.5	0.207035
115	0.20707
115.5	0.207019
116	0.207621

## Sheet: fig7C
Exp. 1
Ferredoxin concentration [µM]	Ferredoxin concentration [mM]	Specific activity [U/mg]
4.91266	0.00491266	0.0869896	0.0869896
9.77199	0.00977199	0	0
14.5788	0.0145788	0.175878	0.175878
24.0385	0.0240385	0.8	0.8
46.8262	0.0468262	1.77963	1.77963
68.4584	0.0684584	4.07322	4.07322
89.0208	0.0890208	5.71268	5.71268
127.238	0.127238	4.18153	4.18153
162.016	0.162016	8.28238	8.28238
212.064	0.212064	5.34027	5.34027
140.479	0.140479	7.84862	7.84862
156.794	0.156794	4.41538	4.41538
Exp. 2
4.07273	0.00407273	0.238825	0.505747	0.266922
4.07273	0.00407273	0.772669
10	0.01	0.68659	0.607918	0.0786718
10	0.01	0.529246
19.422	0.019422	1.01635	1.21765	0.168517
19.422	0.019422	1.20783
19.422	0.019422	1.42878
36.7213	0.0367213	2.82018	2.57867	0.241507
36.7213	0.0367213	2.33716
52.228	0.052228	2.97429	2.74423	0.230055
52.228	0.052228	2.51418
66.2069	0.0662069	2.2642	2.2642	0
Exp. 3
4.19512	0.00419512	0.113889	0.12338	0.00949074
8.30918	0.00830918	0.306667	0.498333	0.191667
20.1878	0.0201878	0.926944	0.828333	0.0986111
38.565	0.038565	1.69315	1.49699	0.196157
55.1872	0.0551872	2.61454	2.10375	0.510787
70.5641	0.0705641	2.18472	2.21181	0.0270833
97.8199	0.0978199	3.06731	3.43852	0.371204
120.702	0.120702	3.76833	3.79208	0.02375
140.984	0.140984	3.45667	3.45667	0
4.19512	0.00419512	0.13287
8.30918	0.00830918	0.69
20.1878	0.0201878	0.729722
38.565	0.038565	1.30083
55.1872	0.0551872	1.59296
70.5641	0.0705641	2.23889
97.8199	0.0978199	3.80972
120.702	0.120702	3.81583

## Sheet: tab1
Tungsten concentration	Specific activity [U/mg]	mean value	SD	Relative specific activity	SD
1.2 nM W	0.0169257	0.0169257	0	0.00218818	0
1.2 nM W	0.0169257
1.2 nM W	0.0169257
12 nM W	0.0338514	0.0394932	0.00797884	0.00510576	0.00103152
12 nM W	0.0338514
12 nM W	0.050777
120 nM W	6.38098	5.05514	0.939574	0.653538	0.12147
120 nM W	4.31605
120 nM W	4.46838
1.2 uM W	6.38098	5.81115	0.428264	0.751276	0.0553668
1.2 uM W	5.34851
1.2 uM W	5.70395
12 uM W	8.63209	7.73503	0.801903	1	0.103672
12 uM W	6.68564
12 uM W	7.88736
120 uM W	9.08909	7.61091	1.04532	0.983953	0.135141
120 uM W	6.88875
120 uM W	6.8549
1.2 mM W	9.17372	8.71672	0.520218	1.12691	0.0672548
1.2 mM W	7.98892
1.2 mM W	8.98753
Molybdenium concentration [µM]	Specific activity [U/mg]	mean value	SD	Relative specific activity	SD		with 490 nM Mo and 120 nM W 65%
0	16.3811	14.9838	1.3973	1.20463	0.112337		0.787271
0	13.5865
0.49	13.4384	12.4385	0.748241	1	0.0601553		0.653538
0.49	12.2385
0.49	11.6386
4.9	12.6458	12.0193	0.776041	0.966299	0.0623903		0.631513
4.9	10.9257
4.9	12.4865
49	0.802703	0.780405	0.0222973	0.0627412	0.0017926		0.0410037
49	0.758108
Iron concentration	Specific activity [U/mg]	mean value	SD	Relative specific activity	SD
11 µM Fe	24.6098	26.0063	1.11929	1	0.0430393
11 µM Fe	26.059
11 µM Fe	27.35
83 µM Fe	41.9692	41.6962	1.43475	1.60331	0.0551693
83 µM Fe	39.8185
83 µM Fe	43.301
Sulfur components	specific activity [U/mg]	mean value	SD	Relative specific activity	SD
2 mM SO4	14.1775	14.1479	0.0311356	1	0.00220073
	14.1613
	14.1048
9 mM SO4	18.842	18.6182	0.407069	1.31597	0.0287725
	18.9657
	18.047
1 mM SO3	10.2117	9.3788	0.607784	0.662913	0.0429594
	9.14622
	8.77848
1 mM S2O4	14.647	13.4659	0.897951	0.951796	0.063469
	12.4713
	13.2794
1 mM S2O3	8.30356	7.80299	0.35416	0.551531	0.0250327
	7.56743
	7.53798
Glucose concentration	specific activity [U/mg]	mean value	SD	Relative specific activity	SD
25 mM	14.1775	14.1479	0.0311356	1	0.00220073
25 mM	14.1613
25 mM	14.1048
100 mM	7.61871	7.50241	0.270702	0.530286	0.0191338
100 mM	7.76014
100 mM	7.12839
Yeast concentration	specific activity [U/mg]	mean value	SD	Relative specific activity	SD
0.002	14.1775	14.1479	0.0311356	1	0.00220073
0.002	14.1613
0.002	14.1048
0.01	29.5945	27.0201	1.99613	1.90984	0.14109
0.01	24.7299
0.01	26.736
Yeast concentration	specific activity [U/mg]	MW	SD	Relative specific activity
25 mM & 0.2%	14.1775	14.1479	0.0311356	1	0.00220073
25 mM & 0.2%	14.1613
25 mM & 0.2%	14.1048
100 mM & 1%	23.136	23.2253	0.0633646	1.64161	0.00447874
100 mM & 1%	23.2758
100 mM & 1%	23.2642

## Sheet: tab2
Benzyl viologen concentration [mM]	Specific activity [U/mg]	Relative specific activity	mean value	SD
0.0606061	0	0	0	0
0.0606061	0	0
0.0606061	0	0
0.121212	0	0	0.371622	0.486668
0.121212	0.0557432	0.00393701
0.121212	1.05912	0.0748031
0.30303	1.39358	0.0984252	1.61655	0.208572
0.30303	1.56081	0.110236
0.30303	1.89527	0.133858
0.606061	2.73142	0.192913	3.08446	0.621286
0.606061	2.56419	0.181102
0.606061	3.95777	0.279528
0.909091	5.01689	0.354331	4.79392	0.315331
0.909091	4.34797	0.307087
0.909091	5.01689	0.354331
1.21212	5.85304	0.413386	6.31292	0.321129
1.21212	6.24324	0.440945
1.21212	6.41047	0.452756
1.21212	6.74493	0.476378
2.12121	8.36149	0.590551	9.67145	0.907006
2.12121	9.69932	0.685039
2.12121	9.69932	0.685039
2.12121	10.9257	0.771654
3.0303	11.1486	0.787402	11.1765	1.38883
3.0303	8.91892	0.629921
3.0303	12.375	0.874016
3.0303	12.2635	0.866142
4.54545	11.1486	0.787402	12.2914	0.678718
4.54545	12.8767	0.909449
4.54545	12.7095	0.897638
4.54545	12.4307	0.877953
6.06061	9.03041	0.637795	12.3639	2.03303
6.06061	10.9814	0.775591
6.06061	14.1588	1
6.06061	13.5456	0.956693
6.06061	14.103	0.996063
Methyl viologen concentration [mM]	Specific activity [U/mg]	Relative specific activity	mean value	SD
0.489237	0.473422	0.0431978	0.631229	0.141478
0.489237	0.603613	0.0550772
0.489237	0.816653	0.0745162
0.978474	1.0652	0.0971951	1.21906	0.155522
0.978474	1.15988	0.105835
0.978474	1.4321	0.130673
2.44618	2.48547	0.226789	2.39867	0.0913376
2.44618	2.43812	0.222469
2.44618	2.27243	0.20735
4.89237	3.76371	0.343423	3.88995	0.359163
4.89237	3.52699	0.321824
4.89237	4.37915	0.39958
7.33855	5.23131	0.477336	5.63767	0.304726
7.33855	5.96512	0.544293
7.33855	5.71657	0.521614
9.78474	6.46221	0.58965	6.33202	0.192548
9.78474	6.47405	0.59073
9.78474	6.0598	0.552932
14.5349	7.33814	0.669575	7.64489	0.985357
14.5349	6.62105	0.604144
14.5349	8.97547	0.818975
19.3798	10.0989	0.921483	10.3578	0.42673
19.3798	10.0152	0.91385
19.3798	10.9594	1
Ferredoxin concentration [µM]	Ferredoxin concentration [mM]	Specific activity [U/mg]
Exp. 1
4.91266	0.00491266	0.135503	0.135503
9.77199	0.00977199	0	0
14.5788	0.0145788	0.273964	0.273964
24.0385	0.0240385	1.24615	1.24615
46.8262	0.0468262	2.77212	2.77212
68.4584	0.0684584	6.34482	6.34482
89.0208	0.0890208	8.89859	8.89859
127.238	0.127238	6.51354	6.51354
162.016	0.162016	12.9014	12.9014
212.064	0.212064	8.31849	8.31849
140.479	0.140479	12.2257	12.2257
156.794	0.156794	6.87781	6.87781
Exp. 2
4.07273	0.00407273	0.372016	0.787798	0.415782
4.07273	0.00407273	1.20358
10	0.01	1.0695	0.94695	0.122546
10	0.01	0.824403
19.422	0.019422	1.58316	1.89673	0.262498
19.422	0.019422	1.88143
19.422	0.019422	2.2256
36.7213	0.0367213	4.39297	4.01678	0.376194
36.7213	0.0367213	3.64058
52.228	0.052228	4.63302	4.27467	0.358355
52.228	0.052228	3.91631
66.2069	0.0662069	3.52692	3.52692	0
Exp. 3
4.19512	0.00419512	0.177404	0.192187	0.0147837
8.30918	0.00830918	0.477692	0.77625	0.298558
20.1878	0.0201878	1.44389	1.29029	0.153606
38.565	0.038565	2.6374	2.33185	0.305553
55.1872	0.0551872	4.07264	3.277	0.795649
70.5641	0.0705641	3.40313	3.44531	0.0421875
97.8199	0.0978199	4.77793	5.35615	0.578221
120.702	0.120702	5.8699	5.9069	0.0369952
140.984	0.140984	5.38442	5.38442	0
4.19512	0.00419512	0.206971
8.30918	0.00830918	1.07481
20.1878	0.0201878	1.13668
38.565	0.038565	2.0263
55.1872	0.0551872	2.48135
70.5641	0.0705641	3.4875
97.8199	0.0978199	5.93438
120.702	0.120702	5.94389
formaldehyde in assay [mM]	specific activity [U/mg]	mean value	SD
0.483092	21.2788	20.9026	0.376188
0.241546	19.8512	18.7419	1.10927
0.0966184	13.1762	12.9158	0.260438
0.0483092	8.00606	8.32437	0.318313
0.0241546	5.28593	5.40168	0.11575
0.483092	20.5264
0.241546	17.6326
0.0966184	12.6554
0.0483092	8.64268
0.0241546	5.51743
acetaldehyde in assay [mM]	specific activity [U/mg]	mean value	SD
0.0966184	29.1305	35.8002	6.66971
0.0483092	26.121	31.3648	5.24385
0.0242248	24.6699	28.8137	4.14376
0.00968992	16.11	18.6725	2.56249
0.00484966	10.8577	11.4342	0.576514
0.0969932	42.4699
0.0484966	36.6087
0.0242483	32.9574
0.00969932	21.2349
0.00484966	12.0107
propionaldehyde in assay [mM]	specific activity [U/mg]	mean value	SD
0.241546	32.7573	33.7221	0.964818
0.0966184	31.6577	33.2684	1.61072
0.0483092	27.7415	28.1395	0.397996
0.0242248	26.1607	26.2441	0.083411
0.00968992	5.0013	9.03448	4.03318
0.00484966	5.86123	6.58187	0.720643
0.242483	34.687
0.0969932	34.8791
0.0484966	28.5375
0.0242483	26.3275
0.00969932	13.0677
0.00484966	7.30252
butyraldehyde in assay [mM]	specific activity [U/mg]	mean value	SD
0.0966184	20.6228	25.589	4.96622
0.0483092	15.607	21.2075	5.60047
0.0242248	15.0039	14.0838	0.920084
0.00968992	4.42423	7.06445	2.64021
0.00484966	0.576514	0.912815	0.3363
0.0969932	30.5553
0.0484966	26.8079
0.0242483	13.1637
0.00969932	9.70466
0.00484966	1.24911
valeraldehyde in assay [mM]	specific activity [U/mg]	mean value	SD
0.0966184	15.7227	19.1514	3.4287
0.0483092	16.0121	20.257	4.24487
0.0241546	17.6037	21.7734	4.16973
0.00966184	12.2502	14.4125	2.16228
0.00484496	12.383	10.7556	1.62745
0.00242483	0.720643	0.960857	0.240214
0.0969932	22.5801
0.0484966	24.5019
0.0242483	25.9432
0.00969932	16.5748
0.00484966	9.12815
0.00242483	1.20107
capronaldehyde in assay [mM]	specific activity [U/mg]	mean value	SD
0.0241546	15.771	15.6925	0.0785182
0.00968992	14.4268	15.0204	0.593546
0.00484966	14.4129	13.452	0.960857
0.00242483	6.48579	6.726	0.240214
0.0242483	15.6139
0.00969932	15.6139
0.00484966	12.4911
0.00242483	6.96622
heptanal in assay [mM]	specific activity [U/mg]	mean value	SD
0.0242248	11.4212	12.6768	1.25559
0.00969932	13.9324	12.1308	1.80161
0.00484966	14.4129	8.52761	5.88525
0.00242483		0.720643	0
0.0242483	13.9324
0.00969932	10.3292
0.00484966	2.64236
0.00242483	0.720643
octanal in assay [mM]	specific activity [U/mg]	mean value	SD
0.0484966	11.0499	11.5303	0.480429
0.0242483	13.9324	12.371	1.56139
0.00969932	9.12815	9.48847	0.360322
0.00484966	0.480429	0.360322	0.120107
0.00242483	0.240214	0.120107	0.120107
0.0484966	12.0107
0.0242483	10.8096
0.00969932	9.84879
0.00484966	0.240214
0.00242483	0

[truncated: 17 more sheets: tab3, figS2, figS3A, figS3B, figS5A, figS5B, figS6, figS7, figS8A, figS8B, figS8C, figS8D, figS9, figS10A, fig10B, tabS1, tabS3]
